# Supplementary material
Source: PubMed Central journal article supplement (PMC4509445)

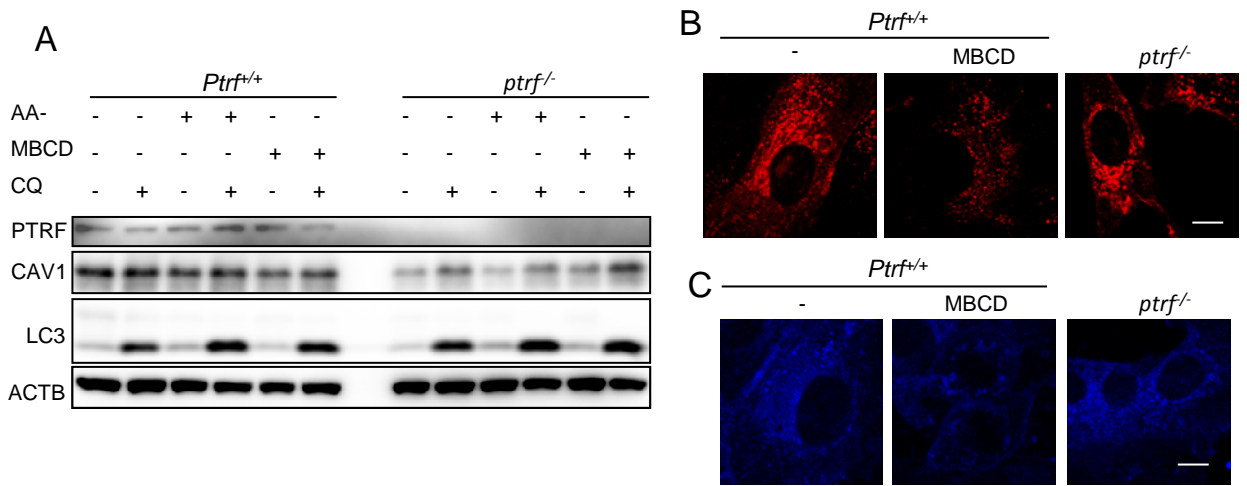

Figure S1

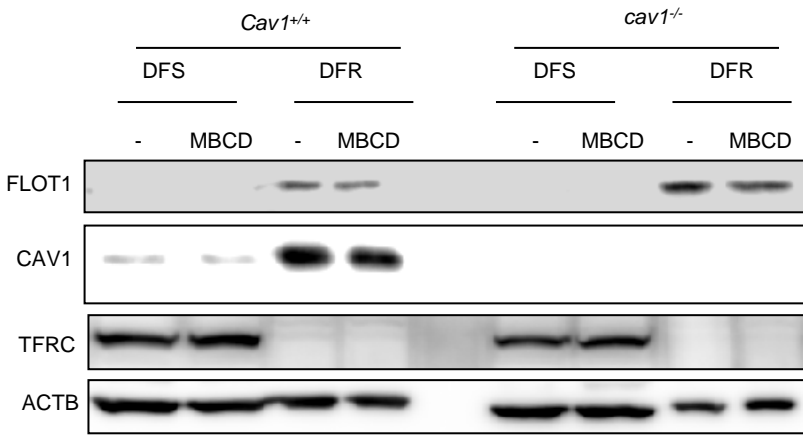

Figure S2

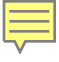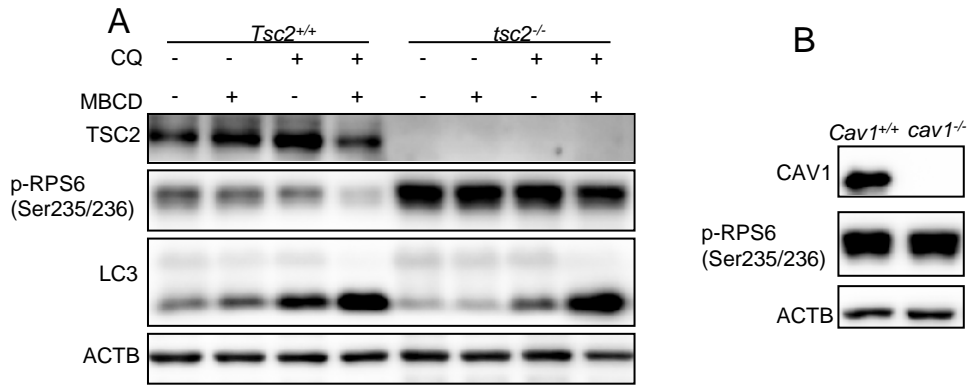

Figure S3

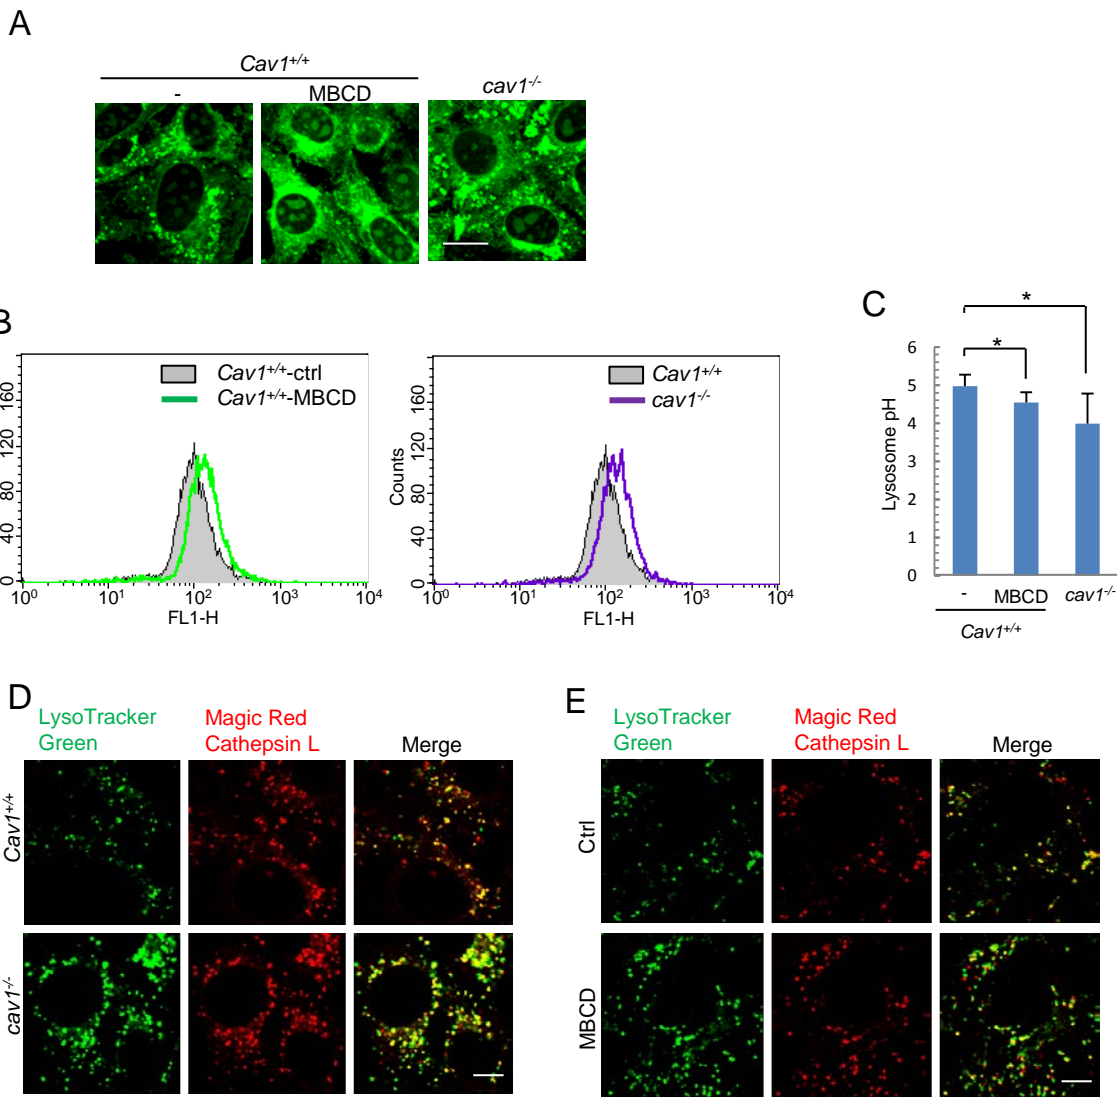

Figure S4

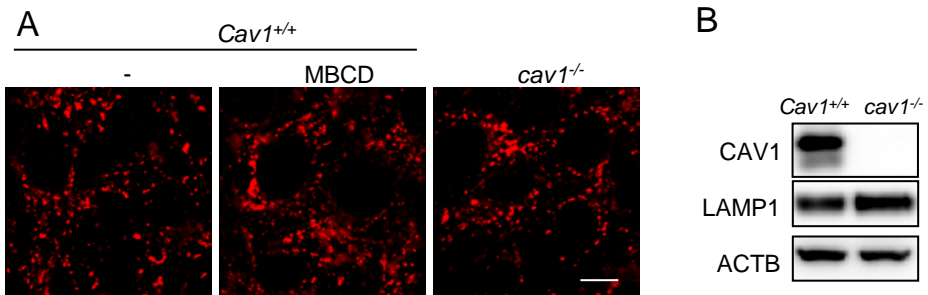

Figure S5

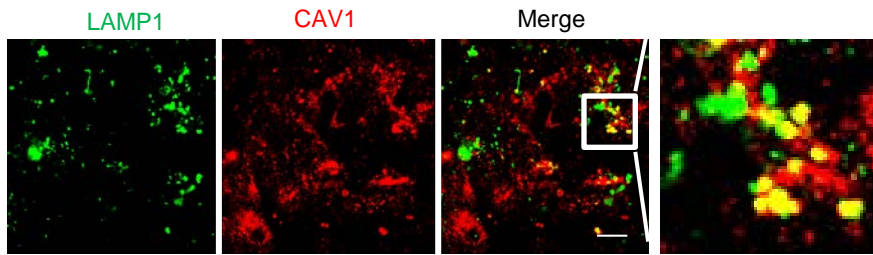

Figure S6

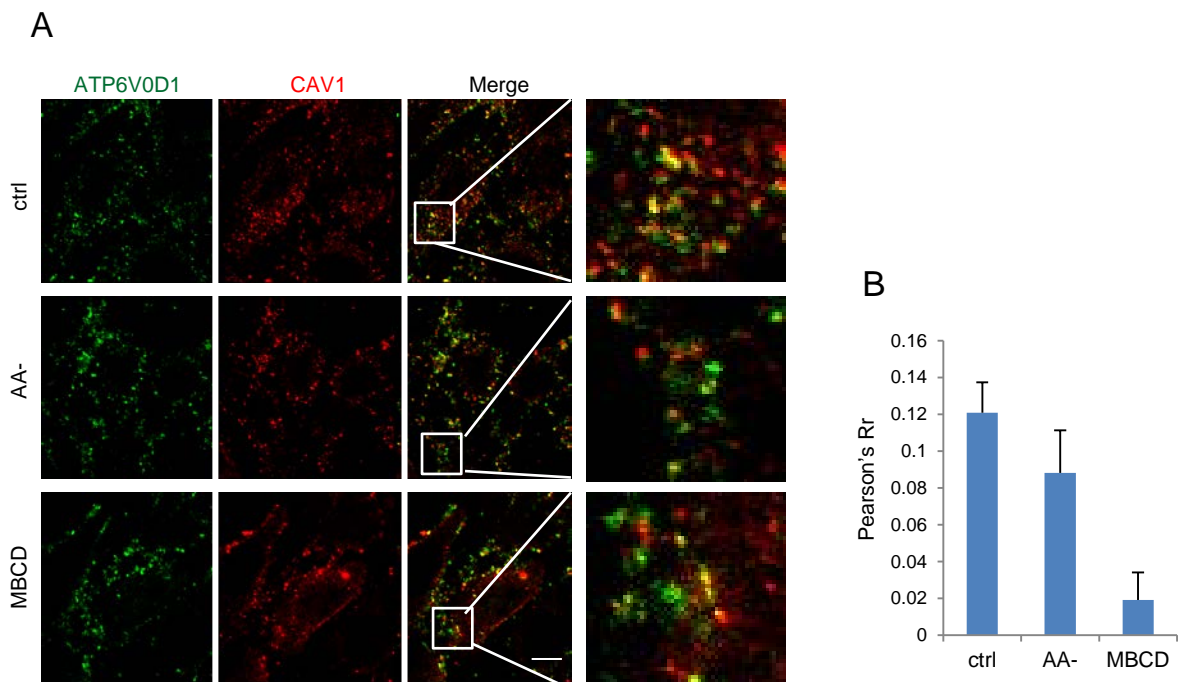

Figure S7

A

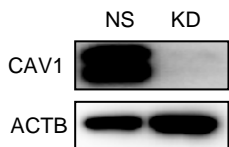

B

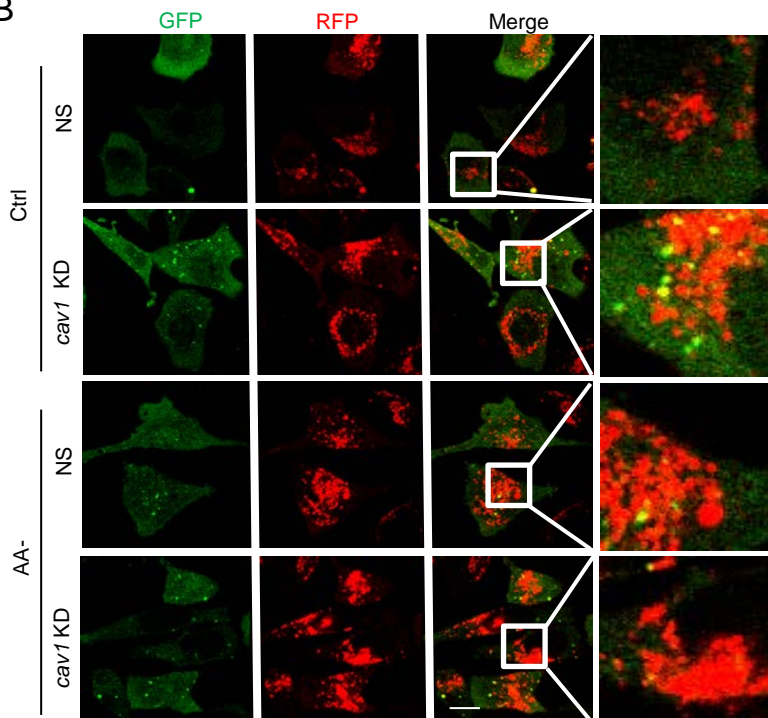

Figure S8

Supplement: kaup-11-05-1034411-s001.pdf [file kaup-11-05-1034411-s001.pdf]
